# Supplementary material for: Number Theory in the Elementary School.
Source: MDPI journal article supplement (doi:10.3390/jcm11195589), 1971-01-01
Supplement: s1 [file s1]

## Supplementary Materials

**Supplementary Table S1.** Results of univariate logistic regression and multivariate logistic regression of other factors with 1-year mortality.

| 1-year mortality  | Univariate logistic regression |         | Multivariate logistic regression |         |
|-------------------|--------------------------------|---------|----------------------------------|---------|
|                   | Odds Ratio (95%CI)             | P value | Odds Ratio (95%CI)               | P value |
| Sex               | 0.48 (0.27-0.88)               | 0.017   | 0.74 (0.39-1.43)                 | 0.368   |
| Age               | 1.01 (0.99-1.03)               | 0.371   | -                                |         |
| BMI               | 0.87 (0.81-0.94)               | <0.001  | 0.91 (0.84-0.99)                 | 0.023   |
| Pre-Hemoglobin    | 0.77 (0.68-0.89)               | <0.001  | 0.94 (0.78-1.13)                 | 0.52    |
| Pre-albumin       | 0.37 (0.24-0.55)               | <0.001  | 0.56 (0.31-1.01)                 | 0.055   |
| Pre-BUN           | 1.03 (0.99-1.08)               | 0.097   | -                                |         |
| Pre-SCr           | 0.76 (0.28-2.09)               | 0.599   | -                                |         |
| Pre-eGFR          | 1.01 (0.99-1.02)               | 0.187   | -                                |         |
| Hypertension      | 1.44 (0.87-2.38)               | 0.158   | -                                |         |
| Diabetes          | 1.25 (0.71-2.21)               | 0.441   | -                                |         |
| History of cancer | 0.87 (0.49-1.52)               | 0.615   | -                                |         |
| CKD               | 0.92 (0.51-1.65)               | 0.771   | -                                |         |
| Emergency surgery | 2.40 (1.24-4.63)               | 0.009   | 2.51 (1.19-5.27)                 | 0.015   |
| Laparoscopic      | 0.78 (0.47-1.30)               | 0.345   | -                                |         |
| ASA>2             | 1.34 (0.75-2.40)               | 0.32    | -                                |         |
| TIVA              | 0.44 (0.24-0.81)               | 0.009   | 0.98 (0.49-1.96)                 | 0.96    |
| Anesthesia time   | 1.28 (1.17-1.39)               | <0.001  | 1.26 (1.15-1.39)                 | <0.001  |

BMI = body mass index; BUN = blood urea nitrogen; eGFR = estimated glomerular filtration rate; CKD = chronic kidney disease; ASA-PS = American Society of Anesthesiologists physical status; TIVA = total intravenous anesthesia.

**Supplementary Table S2.** Baseline characteristics of AKI and non-AKI patients by different KDIGO criteria.

|                                                          | UOmean                  |                         |        | UOcont                  |                         |        | SCR                     |                         |       |
|----------------------------------------------------------|-------------------------|-------------------------|--------|-------------------------|-------------------------|--------|-------------------------|-------------------------|-------|
|                                                          | AKI<br>(N=257)          | NO AKI<br>(N=520)       | p      | AKI<br>(N=61)           | NO AKI<br>(N=716)       | p      | AKI<br>(N=16)           | NO AKI<br>(N=761)       | p     |
| Female sex, n (%)                                        | 77 (30.0)               | 207 (39.8)              | 0.007  | 18 (29.5)               | 266 (37.2)              | 0.23   | 5 (31.3)                | 279 (36.7)              | 0.66  |
| Age, years, median<br>(IQR)                              | 68.6<br>(58.9-<br>75.4) | 68.8<br>(55.4-<br>74.8) | 0.63   | 68 (57.4-<br>75.1)      | 68.8<br>(56.8-<br>75.1) | 0.53   | 70.6<br>(62.0-<br>75.0) | 68.7<br>(56.3-<br>75.0) | 0.44  |
| BMI, kg/m <sup>2</sup> , median<br>(IQR)                 | 22.8<br>(20.5-<br>25.2) | 22.1<br>(19.7-<br>24.4) | 0.007  | 23.5<br>(20.9-<br>25.1) | 22.2<br>(19.9-<br>24.7) | 0.12   | 21.7<br>(19.2-<br>25.4) | 22.2 (20-<br>24.7)      | 0.98  |
| <b>Preoperative biochemical indicators, median (IQR)</b> |                         |                         |        |                         |                         |        |                         |                         |       |
| Hemoglobin, g/dL                                         | 12.6<br>(11.3-<br>13.8) | 13 (11.7-<br>14.1)      | 0.04   | 12.2<br>(11.3-<br>13.5) | 12.9<br>(11.6-<br>14.0) | 0.03   | 12 (10.8-<br>13.3)      | 12.9<br>(11.5-<br>14.0) | 0.09  |
| Albumin, g/dL                                            | 4 (3.5-<br>4.3)         | 4.1 (3.7-<br>4.4)       | <0.001 | 4 (3.5-<br>4.3)         | 4.1 (3.7-<br>4.4)       | 0.09   | 3.7 (3.2-<br>4.1)       | 4.1 (3.7-<br>4.3)       | 0.02  |
| Serum creatinine, mg/dL                                  | 0.79<br>(0.65-<br>0.90) | 0.77<br>(0.64-<br>0.94) | 0.92   | 0.8<br>(0.66-<br>0.88)  | 0.77<br>(0.64-<br>0.93) | 0.9    | 0.88<br>(0.76-<br>1.12) | 0.77<br>(0.64-<br>0.92) | 0.09  |
| BUN, mg/dL                                               | 14.4<br>(11.3-<br>17.6) | 14.6<br>(12.1-<br>18.2) | 0.03   | 14.6<br>(11.8-<br>17.4) | 14.6<br>(11.8-<br>18.0) | 0.88   | 18 (13.2-<br>21.4)      | 14.5<br>(11.8-<br>18.0) | 0.1   |
| eGFR, mL/min/1.73m <sup>2</sup>                          | 71.2<br>(60.9-<br>84.1) | 69.8<br>(58.5-<br>82.8) | 0.12   | 70.7<br>(60.9-<br>84.2) | 70.6<br>(58.3-<br>83.1) | 0.64   | 59.2<br>(45.2-<br>74.8) | 70.7<br>(69.9-<br>83.1) | 0.05  |
| <b>Comorbidities, n (%)</b>                              |                         |                         |        |                         |                         |        |                         |                         |       |
| Hypertension                                             | 124<br>(48.3)           | 212 (40.8)              | 0.048  | 26 (42.6)               | 310 (43.3)              | 0.92   | 11 (68.8)               | 325 (42.7)              | 0.037 |
| Diabetes                                                 | 64 (24.9)               | 118 (22.7)              | 0.49   | 19 (31.2)               | 163 (22.8)              | 0.14   | 5 (31.3)                | 177 (23.3)              | 0.46  |
| History of cancer                                        | 62 (24.1)               | 171 (32.9)              | 0.012  | 14 (23.0)               | 219 (60.6)              | 0.21   | 3 (18.8)                | 230 (30.2)              | 0.32  |
| CKD(>G2)                                                 | 54 (21.0)               | 146 (28.1)              | 0.034  | 13 (21.3)               | 187 (26.1)              | 0.41   | 8 (50.0)                | 192 (25.2)              | 0.025 |
| Information of surgery, n (%)                            |                         |                         | <0.001 |                         |                         | <0.001 |                         |                         | 0.005 |
| Abdominal surgery                                        | 149<br>(58.0)           | 191 (36.7)              |        | 41 (67.2)               | 299 (41.8)              |        | 14 (87.5)               | 326 (42.9)              |       |

|                  |           |            |           |            |         |            |
|------------------|-----------|------------|-----------|------------|---------|------------|
| Thoracic surgery | 66 (25.7) | 229 (44.0) | 8 (13.1)  | 287 (40.1) | 1 (6.3) | 294 (38.6) |
| Other surgery    | 42 (16.3) | 100 (19.2) | 12 (19.7) | 130 (18.2) | 1 (6.3) | 141 (18.5) |

**Supplementary Table S2.** *Cont.*

|                                  | UOmean         |                   |        | UOcont         |                   |        | SCR            |                   |        |
|----------------------------------|----------------|-------------------|--------|----------------|-------------------|--------|----------------|-------------------|--------|
|                                  | AKI<br>(N=257) | NO AKI<br>(N=520) | p      | AKI<br>(N=61)  | NO AKI<br>(N=716) | p      | AKI<br>(N=16)  | NO AKI<br>(N=761) | p      |
| Emergency surgery                | 32 (12.5)      | 47 (9.0)          | 0.14   | 4 (6.6)        | 75 (10.5)         | 0.33   | 2 (12.5)       | 77 (10.1)         | 0.76   |
| Laparoscopic surgery             | 95 (37.0)      | 266 (51.2)        | <0.001 | 19 (31.2)      | 342 (47.8)        | 0.012  | 4 (25.0)       | 357 (47.0)        | 0.08   |
| Information of anesthesia, n (%) |                |                   |        |                |                   |        |                |                   |        |
| ASA-PS                           |                |                   | 0.27   |                |                   | 0.36   |                |                   | 0.1    |
| I                                | 51 (19.8)      | 111 (21.4)        |        | 17 (27.9)      | 145 (20.3)        |        | 1 (6.3)        | 161 (21.2)        |        |
| II                               | 143 (55.6)     | 309 (59.4)        |        | 42 (68.9)      | 421 (58.8)        |        | 8 (50.0)       | 444 (58.3)        |        |
| III                              | 60 (23.4)      | 98 (18.9)         |        | 23 (37.7)      | 146 (20.4)        |        | 7 (43.8)       | 151 (19.8)        |        |
| IV                               | 3 (1.2)        | 2 (0.4)           |        | 1 (1.6)        | 4 (0.6)           |        | 0 (0.0)        | 5 (0.7)           |        |
| TIVA                             | 69 (26.9)      | 214 (41.2)        | <0.001 | 13 (21.3)      | 270 (37.7)        | 0.011  | 0 (0.0)        | 283 (37.2)        | 0.002  |
| Anesthesia duration, h           | 7.6 (5.3-10.1) | 5.7 (4.4-8.2)     | <0.001 | 8.5 (7.0-10.9) | 6 (4.6-8.8)       | <0.001 | 10.2 (8.1-9.0) | 6.2 (4.6-9.0)     | <0.001 |

BMI = body mass index; BUN = blood urea nitrogen; eGFR = estimated glomerular filtration rate; CKD = chronic kidney disease; ASA-PS = American Society of Anesthesiologists physical status; TIVA = total intravenous anesthesia.

**Supplementary Table S3.** Unadjusted and adjusted hazard ratios for AKI with 90-day mortality and 1-year mortality under different criteria using KDIGO guidelines.

|                                  | 90-day Mortality  | 1-year Mortality  |
|----------------------------------|-------------------|-------------------|
| <b>UOmean-AKI</b>                |                   |                   |
| Unadjusted hazard ratio (95% CI) | 8.18 (1.74-38.54) | 2.56 (1.37-4.78)  |
| Adjusted hazard ratio (95% CI)   | 5.72(1.15-28.59)  | 1.72 (0.89-3.30)  |
| <b>UOcont-AKI</b>                |                   |                   |
| Unadjusted hazard ratio (95% CI) | 1.30 (0.16-10.29) | 1.72 (0.68-4.40)  |
| Adjusted hazard ratio (95% CI)   | 0.83 (0.10- 6.85) | 1.09 (0.42- 2.85) |
| <b>SCR-AKI</b>                   |                   |                   |
| Unadjusted hazard ratio (95% CI) | 5.32 (0.67-42.02) | 4.25 (1.31-13.79) |
| Adjusted hazard ratio (95% CI)   | 2.90 (0.33-25.56) | 1.93 (0.57- 6.59) |
